# Supplementary material for: Photosynthesis of hydrogen peroxide from dioxygen and water using aluminium-based metal–organic framework assembled with porphyrin- and pyrene-based linkers
Source: Royal Society of Chemistry journal article supplement (doi:10.1039/d3ta01051a), 2023-01-01
Supplement: d3ta01051a1.pdf [file d3ta01051a1.pdf]

## Supporting Information

### Photosynthesis of hydrogen peroxide from dioxygen and water using aluminium-based metal–organic framework assembled with porphyrin- and pyrene-based linkers

Yoshifumi Kondo,<sup>a</sup> Kenta Hino,<sup>a</sup> Yasutaka Kuwahara,<sup>a,b,c</sup> Kohsuke Mori,<sup>a,b</sup> and Hiromi Yamashita\*,<sup>a,b</sup>

<sup>a</sup> Division of Materials and Manufacturing Science, Graduate School of Engineering, Osaka University, 2-1 Yamadaoka, Suita, Osaka 565-0871, Japan.

<sup>b</sup> Innovative Catalysis Science Division, Institute for Open and Transdisciplinary Research Initiatives (OTRI), Osaka University, 2-1 Yamadaoka, Suita, Osaka 565-0871, Japan.

<sup>c</sup> JST, PRESTO, 4-1-8 Honcho, Kawaguchi, Saitama 332-0012, Japan.

## **Table of contents**

|                       | <b>Pages</b>   |
|-----------------------|----------------|
| <b>Experimental</b>   | <b>S3 – S4</b> |
| <b>Figure S1 – S2</b> | <b>S5 – S6</b> |
| <b>Table S1 – S3</b>  | <b>S7 – S8</b> |
| <b>References</b>     | <b>S9</b>      |

## **Experimental Section**

### **Characterization**

Powder X-ray diffraction (XRD) patterns were recorded using a Rigaku Ultima IV diffractometer with Cu K $\alpha$  irradiation ( $\lambda = 1.54056$  Å, 40 kV to 40 mA). Nitrogen sorption isotherms were acquired at -196 °C using a BELSORP-max system (MicrotracBEL Corp.). Samples were preheated at 150 °C for 16 h before the measurement. Specific surface areas were calculated by the Brunauer-Emmett-Teller (BET) method using nitrogen adsorption data based on ISO 9277 standard. Pore distribution was calculated by the Non-Local Density Functional Theory (NLDFT) method. Proton nuclear magnetic resonance ( $^1\text{H-NMR}$ ) spectra were obtained on a JEOL JNM-ECS 400 spectrometer operating at 400 MHz. UV-Vis spectra were collected on a Shimadzu UV-2600 spectrometer equipped with an integrating sphere. BaSO $_4$  was used as a reference, and absorption spectra were obtained using the Kubelka-Munk function. Steady-state photoluminescence (PL) spectra were obtained using a Horiba Fluorolog-3 spectrofluorometer at room temperature. The excitation wavelength of PL measurements was 420 nm. Time-resolved PL measurements and time-resolved emission spectroscopy (TRES) measurements were performed using a Horiba DeltaFlex.

### **Determination of the molar ratio between TCPP and TBAPy linkers**

A MOF sample (1.0 mg) was dissolved in dimethylsulfoxide- $d_6$  (DMSO- $d_6$ ) containing 10 vol% deuterium sulfate (D $_2$ SO $_4$ ). The supernatant liquid was transferred to a NMR tube.

### **Photocatalytic H $_2$ O $_2$ production**

MOF samples (5.0 mg) and distilled water (5.0 mL) were added into a Pyrex reaction vessel (30 mL). The mixture was bubbled with O $_2$  for 15 min under dark condition after sonication. Thereafter, the reaction solution was irradiated from the side with a Xe lamp (100 mW/cm $^2$ , 500 W, SAN-EIELECTRIC XEF-501S) through a glass filter ( $\lambda > 420$  nm) for 3 h with magnetic stirring at ambient pressure and temperature.

### **H<sub>2</sub>O<sub>2</sub> decomposition test**

Al-TCPP10, Al-TCPP4-TBAPy6, and Al-TBAPy10 (5.0 mg) and 0.5 mmol·L<sup>-1</sup> H<sub>2</sub>O<sub>2</sub> aqueous solution (5.0 mL) were added to a Pyrex reaction vessel (30 mL), which was sealed with a rubber septum. The mixture solution was stirred under dark conditions at ambient pressure and temperature.

### **Quantification of produced H<sub>2</sub>O<sub>2</sub>**

The amount of H<sub>2</sub>O<sub>2</sub> produced was determined by spectroscopic titration with an acidic solution of [TiO(tpypH<sub>4</sub>)]<sup>4+</sup> complex (Ti-TPyP reagent). The [TiO(tpypH<sub>4</sub>)]<sup>4+</sup> complex (3.4 mg) was dissolved in 50 mmol·L<sup>-1</sup> HCl aqueous solution (100 mL). This solution was used as the Ti-TPyP reagent. The sample solution was diluted with purified water. The diluted sample solution (0.25 mL) was mixed with 4.8 mol·L<sup>-1</sup> HClO<sub>4</sub> aqueous solution (0.25 mL) and Ti-TPyP reagent (0.25 mL). After a few minutes, the mixture was diluted to 2.5 mL with purified water. The absorbance of this solution at  $\lambda = 434$  nm ( $A_S$ ) was measured using a Shimadzu UV-2600 UV-Vis spectroscope. A blank solution was prepared by adding purified water in place of the sample solution (0.25 mL) and its absorbance was defined as  $A_B$ . The difference in absorbance ( $\Delta A_{434}$ ) was determined by the following equation:  $\Delta A_{434} = A_B - A_S$ . Based on  $\Delta A_{434}$  and the volume of the solution, the amount of hydrogen peroxide was determined according to the literature.<sup>1</sup>

### **The detection of active oxygen using ESR measurements**

For trapping superoxide radicals (O<sub>2</sub><sup>·-</sup>), Al-TCPP4-TBAPy6 powder (1.0 mg) was suspended in a 100 mmol·L<sup>-1</sup> DMPO water/acetonitrile (1:4) solution (1.0 mL). For trapping singlet oxygen (<sup>1</sup>O<sub>2</sub>) species, Al-TCPP4-TBAPy6 powder (1.0 mg) was suspended in a 50 mmol·L<sup>-1</sup> TEMPO water/acetonitrile (1:4) solution (1.0 mL). All solutions were mixed, transferred into a quartz ESR cell, and bubbled O<sub>2</sub> for 15 min. The ESR measurements were performed by using an ESR spectrometer (JEOL RESONANCE JES-TE200) at room temperature. Test samples were irradiated by using a light focused from a xenon arc-lamp (Ushio Co., UXL10, Tokyo, Japan) through a glass filter ( $\lambda > 420$  nm). ESR measurements were conducted under the following conditions: microwave power, 1.0 mW; center of magnetic field, 336.0 mT; sweep width, 7.5 mT; sweep time, 1 min; modulation width, 0.1 mT; amplitude, 400; time constant, 0.1 s. Signal intensities were normalized to a MnO marker.

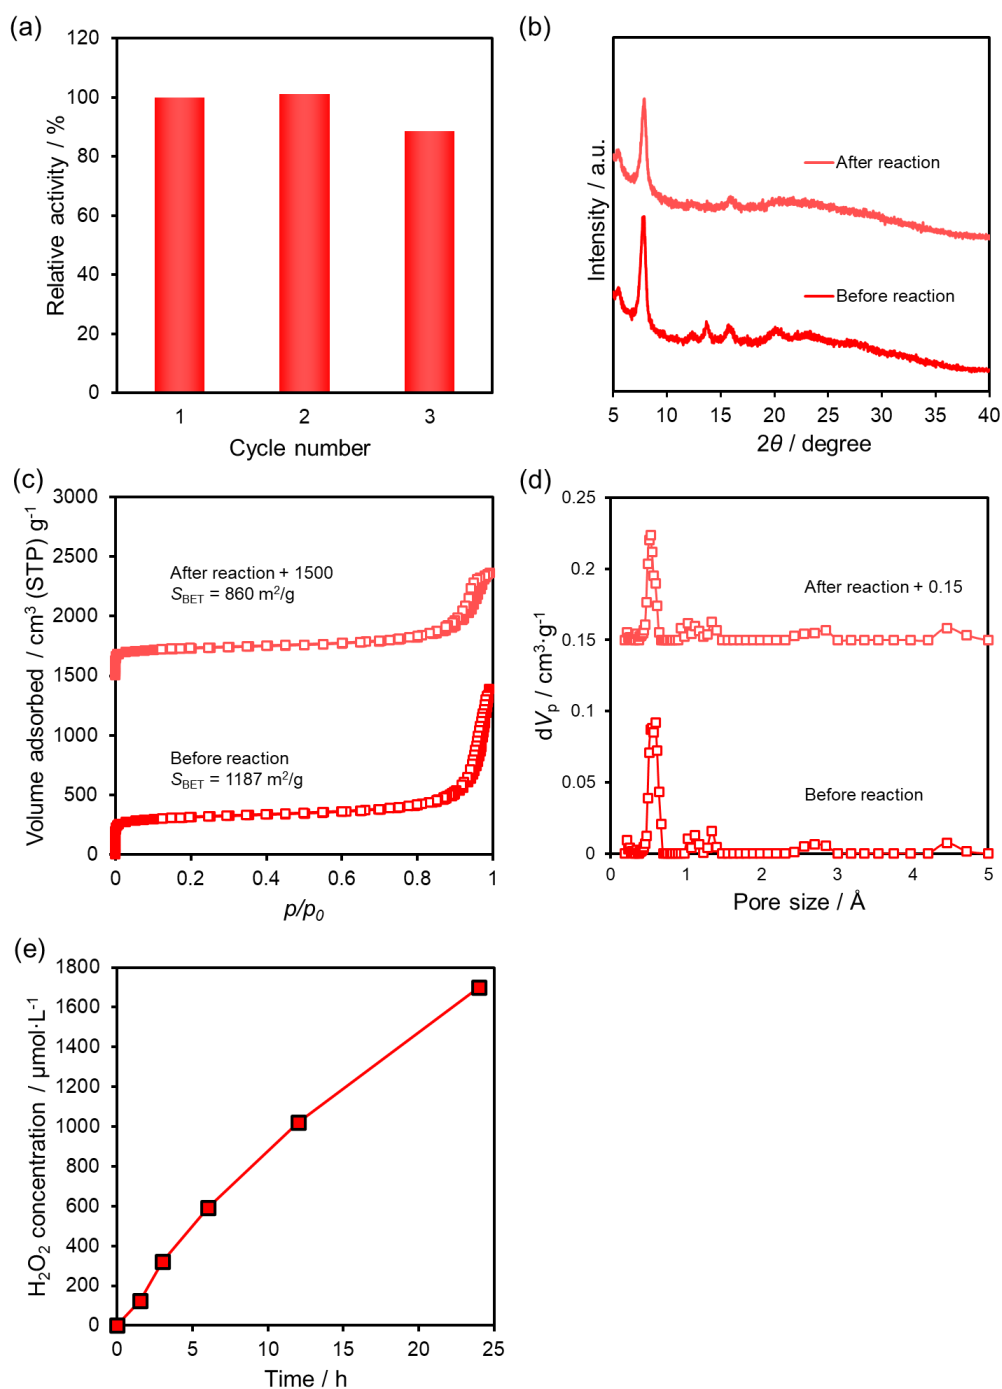

**Fig. S1** (a) Recycle tests using Al-TCPP4-TBAPy6 in distilled water in O<sub>2</sub> atmosphere under visible-light ( $\lambda > 420$  nm) irradiation. (b) PXRD patterns, (c) N<sub>2</sub> physisorption isotherms and (d) pore distributions calculated using NLDFT method of Al-TCPP4-TBAPy6 before and after the reactions. (e) Time course of H<sub>2</sub>O<sub>2</sub> production under visible-light ( $\lambda > 420$  nm) irradiation of Al-TCPP4-TBAPy6 during the long-term reaction.

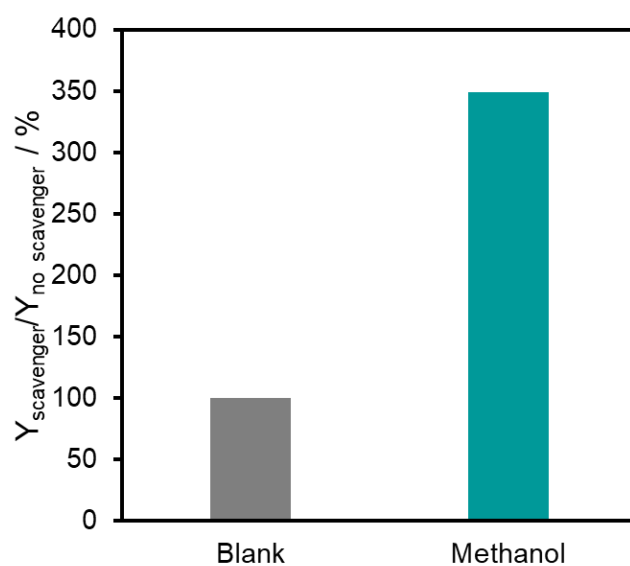

**Fig. S2** Comparison of  $\text{H}_2\text{O}_2$  concentration generated over Al-TCPP4-TBAPy6 under visible-light ( $\lambda > 420$  nm) irradiation for 3 h with and without methanol as a hole scavenger.

**Table S1** The molar ratio of TCPP and TBAPy linkers in Al-TCPP(10-X)-TBAPyX samples added during synthesis.

| Sample          | TCPP / mg | TBAPy / mg |
|-----------------|-----------|------------|
| Al-TCPP10       | 50        | 0.0        |
| Al-TCPP8-TBAPy2 | 40        | 9.0        |
| Al-TCPP6-TBAPy4 | 30        | 18         |
| Al-TCPP4-TBAPy6 | 20        | 27         |
| Al-TCPP2-TBAPy8 | 10        | 36         |
| Al-TBAPy10      | 0         | 48         |

**Table S2** Comparison of photocatalytic activities on H<sub>2</sub>O<sub>2</sub> production from O<sub>2</sub> and water over MOF photocatalysts.<sup>2-4</sup>

| Sample          | H <sub>2</sub> O <sub>2</sub> production rate / $\mu\text{mol}\cdot\text{L}^{-1}\cdot\text{h}^{-1}$ | Reaction condition                                                                                                      | Ref.      |
|-----------------|-----------------------------------------------------------------------------------------------------|-------------------------------------------------------------------------------------------------------------------------|-----------|
| Al-TCPP4-TBAPy6 | 127                                                                                                 | MOF 5.0 mg, distilled water<br>5.0 mL, Xe lamp ( $\lambda > 420$ nm,<br>100 mW·cm <sup>-1</sup> )                       | This work |
| MIL-125-PDI     | 24                                                                                                  | MOF 5.0 mg, distilled<br>water/acetonitrile (1:4) 5.0<br>mL, Xe lamp ( $\lambda > 420$ nm,<br>800 mW·cm <sup>-1</sup> ) | 2         |
| MIL-001*        | 7.0                                                                                                 | MOF 5.0 mg, distilled water<br>5.0 mL, Xe lamp ( $\lambda > 420$ nm,<br>100 mW·cm <sup>-1</sup> )                       | 3         |
| Ni/Hf-0.5       | 10.7                                                                                                | MOF 5.0 mg, distilled water<br>5.0 mL, Xe lamp ( $\lambda > 420$ nm,<br>100 mW·cm <sup>-1</sup> )                       | 4         |

\*We could not replicate the activity in the reference paper (Ref. 9), so we conducted a photocatalytic test under the above condition.

**Table S3** PL lifetimes and contribution rates of Al-TBAPy10 and Al-TCPP4-TBAPy6 excited at 405 nm.

| Sample          | $\tau_1$ / ns | $\tau_2$ / ns | $\tau_3$ / ns | $\tau_4$ / ns |
|-----------------|---------------|---------------|---------------|---------------|
| Al-TBAPy10      | 0.28 (4.55)   | 2.28 (35.54)  | 11.48 (32.04) | 39.55 (27.88) |
| Al-TCPP4-TBAPy6 | 0.07 (11.51)  | 2.09 (88.49)  | -             | -             |



## References

- 1 C. Matsubara, N. Kawamoto and K. Takamura, *Analyst*, 1992, **117**, 1781–1784.
- 2 X. Chen, Y. Kondo, S. Li, Y. Kuwahara, K. Mori, D. Zhang, C. Louis and H. Yamashita, *J. Mater. Chem. A*, 2021, **9**, 26371–26380.
- 3 Y. Zheng, H. Zhou, B. Zhou, J. Mao and Y. Zhao, *Catal. Sci. Technol.*, 2022, **12**, 969–975.
- 4 Y. Kondo, K. Honda, Y. Kuwahara, K. Mori, H. Kobayashi and H. Yamashita, *ACS Catal.*, 2022, **12**, 14825–14835.
